# Supplementary material for: Exploring the Role of Miniemulsion Nanodroplet Confinement on the Crystallization of MoO3: Morphology Control and Insight on Crystal Formation by In Situ Time-Resolved SAXS/WAXS
Source: MDPI journal article supplement (doi:10.3390/nano13061046), 2023-03-14
Supplement: s1 [file s1]

# Exploring the role of miniemulsion nanodroplets confinement on the crystallization of MoO<sub>3</sub>: morphology control and insight on crystal formation by *in situ* time-resolved SAXS/WAXS

Francesca Tajoli <sup>1</sup>, Maria Vittoria Massagrande <sup>1</sup>, Rafael Muñoz-Espí <sup>2</sup> and Silvia Gross <sup>1,3,\*</sup>

<sup>1</sup> Dipartimento di Scienze Chimiche (DiSC), Università degli Studi di Padova, Via Marzolo 1, 35131 Padova, Italy

<sup>2</sup> Institute of Materials Science (ICMUV), Universitat de València, Catedràtic José Beltrán 2, 46980 Paterna, València, Spain

<sup>3</sup> Karlsruher Institut für Technologie (KIT), Institut für Technische Chemie und Polymerchemie (ITCP), Engesserstrasse 20, 76131, Karlsruhe, Germany

\* Correspondence: [silvia.gross@unipd.it](mailto:silvia.gross@unipd.it)

## 1. Samples lists

Miniemulsion samples are listed in Table S1, together with relative experimental conditions.

**Table S1.** Molybdenum oxide samples synthesized by ME approach.

| Sample name | Conc of AHM solution (M) | AHM:HNO <sub>3</sub> molar ratio | US after acid addition | Reaction time |
|-------------|--------------------------|----------------------------------|------------------------|---------------|
| MO01-me     | 0.10                     | 1:10                             | yes                    | 24 h          |
| MO02-me     | 0.15                     | 1:10                             | yes                    | 24 h          |
| MO03-me     | 0.20                     | 1:10                             | yes                    | 24 h          |
| MO04-me     | 0.25                     | 1:10                             | yes                    | 24 h          |
| MO05-me     | 0.20                     | 1:15                             | yes                    | 24 h          |
| MO06-me     | 0.20                     | 1:20                             | yes                    | 24 h          |
| MO07-me     | 0.20                     | 1:25                             | yes                    | 24 h          |
| MO08-me     | 0.20                     | 1:10                             | no                     | 24 h          |
| MO09-me     | 0.20                     | 1:20                             | no                     | 24 h          |
| MO10-me     | 0.20                     | 1:20                             | no                     | 48 h          |
| MO11-me     | 0.20                     | 1:10                             | yes                    | 5 min         |
| MO12-me     | 0.20                     | 1:10                             | yes                    | 6 h           |
| MO13-me     | 0.20                     | 1:10                             | yes                    | 18 h          |
| MO14-me     | 0.20                     | 1:10                             | no                     | 5 min         |
| MO15-me     | 0.20                     | 1:10                             | no                     | 6 h           |
| MO16-me     | 0.20                     | 1:10                             | no                     | 18 h          |

Batch samples are listed in Table S2, together with relative experimental conditions.

**Table S2.** Molybdenum oxide samples synthesized by batch approach.

| Sample name | Conc of AHM solution (M) | AHM:HNO <sub>3</sub> molar ratio | US after acid addition | Reaction time |
|-------------|--------------------------|----------------------------------|------------------------|---------------|
| MO01-b      | 0.10                     | 1:10                             | no                     | 24 h          |
| MO02-b      | 0.15                     | 1:10                             | no                     | 24 h          |
| MO03-b      | 0.20                     | 1:10                             | no                     | 24 h          |
| MO04-b      | 0.25                     | 1:10                             | no                     | 24 h          |
| MO05-b      | 0.20                     | 1:15                             | no                     | 24 h          |
| MO06-b      | 0.20                     | 1:20                             | no                     | 24 h          |
| MO07-b      | 0.20                     | 1:25                             | no                     | 24 h          |
| MO08-b      | 0.20                     | 1:10                             | yes                    | 24 h          |
| MO09-b      | 0.20                     | 1:10                             | no                     | 5 min         |
| MO10-b      | 0.20                     | 1:10                             | no                     | 6 h           |
| MO11-b      | 0.20                     | 1:10                             | no                     | 18 h          |

## 2. ATR spectra of miniemulsion and batch samples

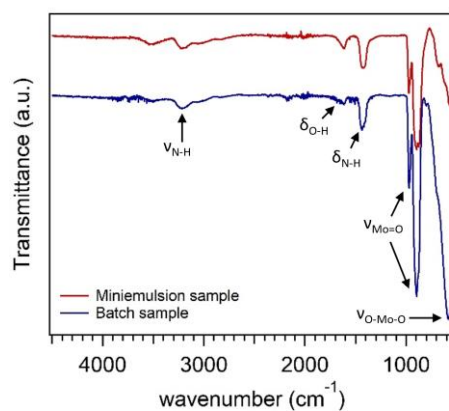

**Figure S1.** ATR spectra of miniemulsion (red) and batch (blue) samples.

### 3. Effect of AHM concentration

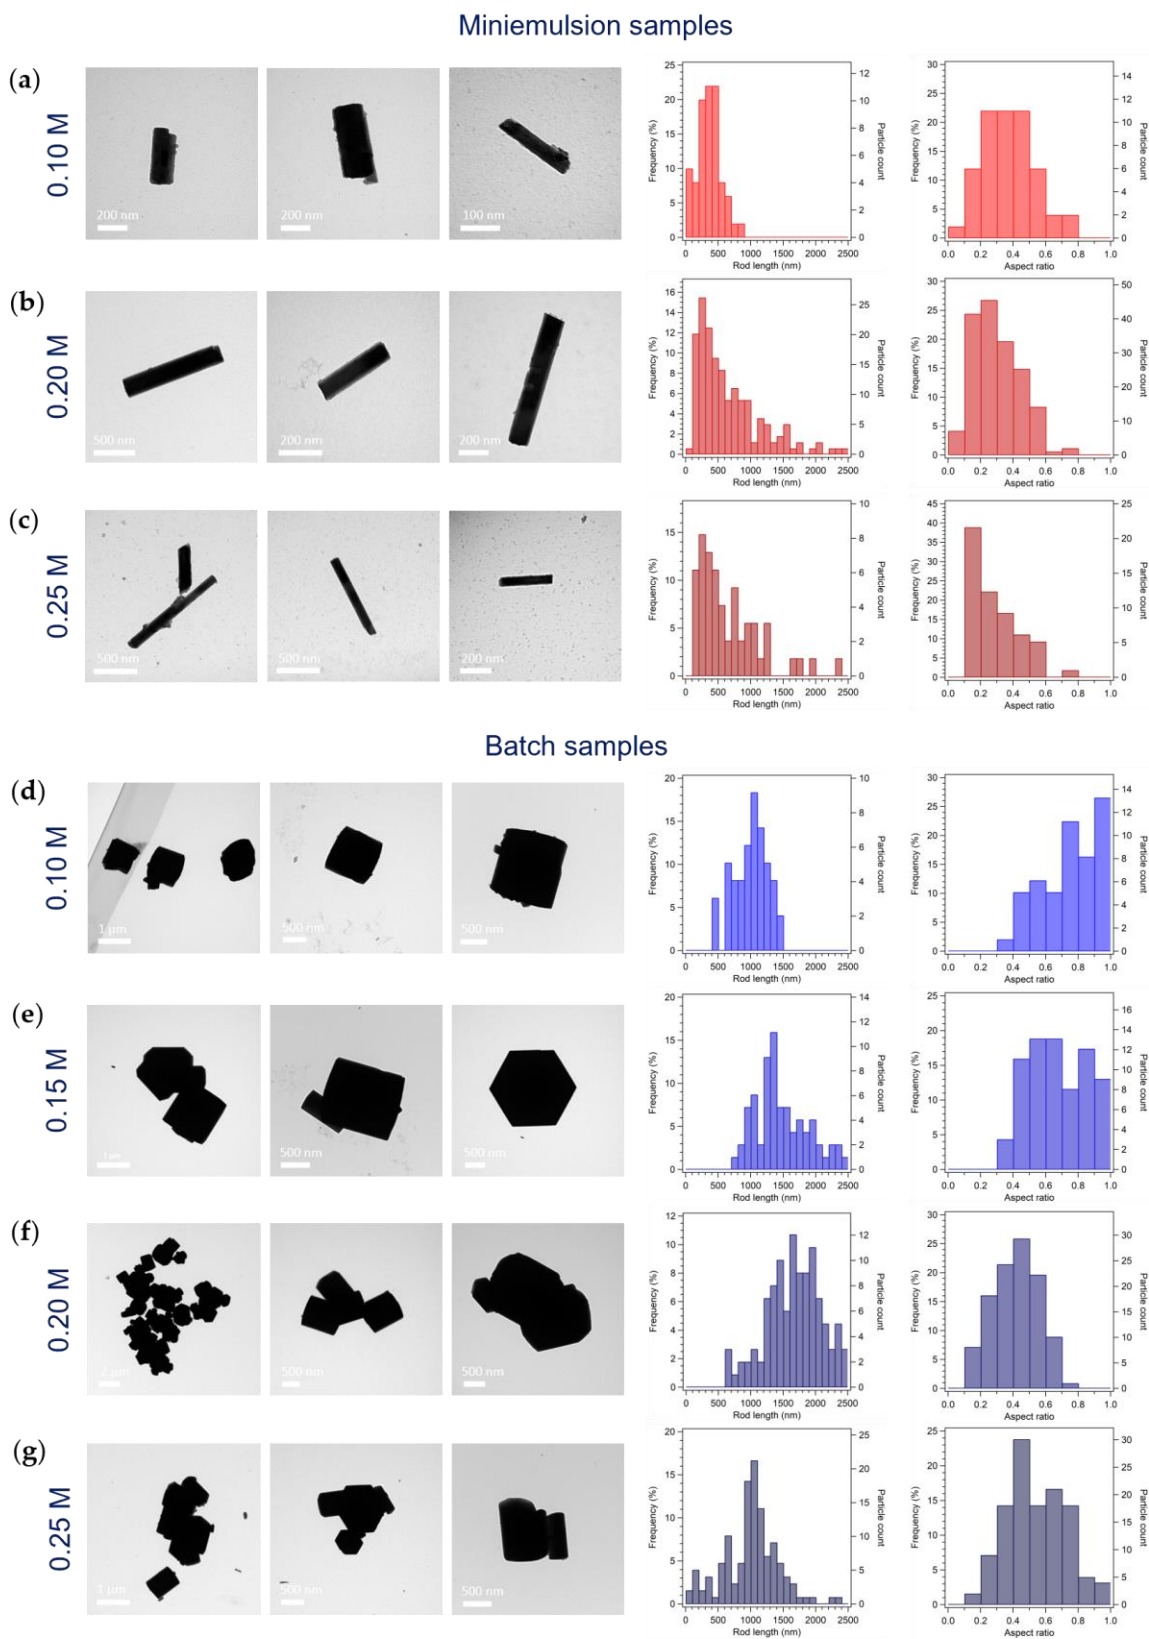

**Figure S2.** TEM micrographs and relative histograms of rod length and aspect ratio distributions of (a-c) miniemulsion and (d-g) batch samples synthesized at different AHM concentrations (0.10, 0.15, 0.20, and 0.25 M) and constant AHM: HNO<sub>3</sub> molar ratio (1:10 mol) and reaction time (24 h). \*ME sample 0.15 M not reported because of bad quality of TEM micrographs.

**Table S3.** Average rod length, width and aspect ratio (AR=width/length) and standard deviations of miniemulsion and batch samples synthesized at different AHM concentrations (0.10, 0.15, 0.20, and 0.25 M) and constant AHM: HNO<sub>3</sub> molar ratio (1:10 mol) and reaction time (24 h).

|       | Sample name          | [AHM] (M) | Length (nm)            | Width (nm)            | Aspect ratio           |
|-------|----------------------|-----------|------------------------|-----------------------|------------------------|
| ME    | MO01-me              | 0.10      | 355 ± 180              | 125 ± 70              | 0.4 ± 0.1              |
|       | MO02-me <sup>1</sup> | 0.15      | 565 ± 271 <sup>1</sup> | 237 ± 88 <sup>1</sup> | 0.4 ± 0.2 <sup>1</sup> |
|       | MO03-me              | 0.20      | 656 ± 499              | 176 ± 152             | 0.3 ± 0.1              |
|       | MO04-me              | 0.25      | 659 ± 486              | 159 ± 134             | 0.3 ± 0.1              |
| batch | MO01-b               | 0.10      | 998 ± 259              | 759 ± 292             | 0.7 ± 0.2              |
|       | MO02-b               | 0.15      | 1488 ± 429             | 1005 ± 418            | 0.7 ± 0.2              |
|       | MO03-b               | 0.20      | 1697 ± 445             | 730 ± 345             | 0.4 ± 0.1              |
|       | MO04-b               | 0.25      | 1108 ± 419             | 576 ± 340             | 0.5 ± 0.2              |

<sup>1</sup> Insufficient statistics due to bad quality of TEM micrographs

#### 4. Effect of AHM:HNO<sub>3</sub> molar ratio

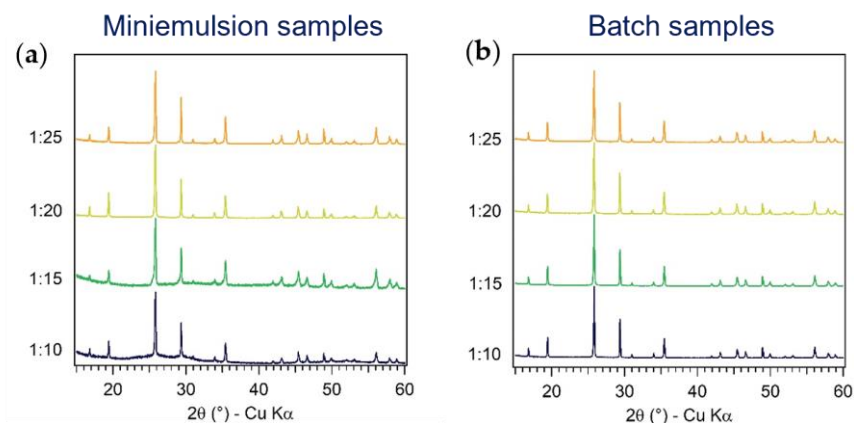

**Figure S3.** Comparison of XRD pattern of h-MoO<sub>3</sub> samples synthesized in (a) miniemulsion and (b) batch as a function of AHM: HNO<sub>3</sub> molar ratio (1:10, 1:15, 1:20, 1:25 mol), keeping constant the AHM concentration (0.20 M) and the reaction time (24 h).

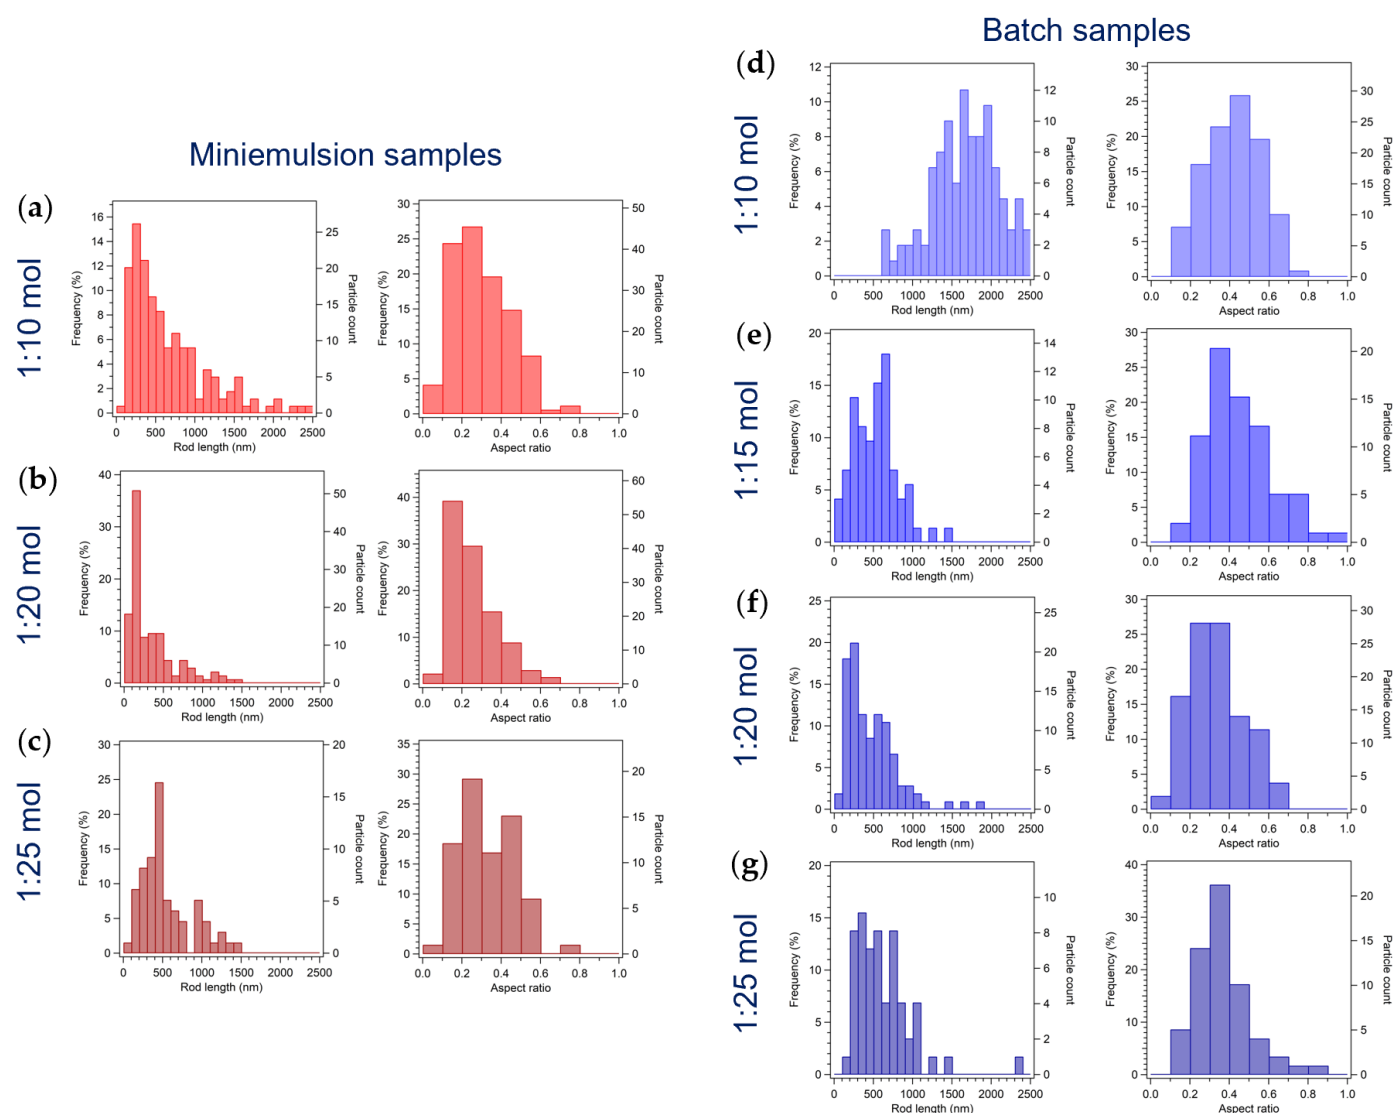

**Figure S4.** Histograms of rod length and aspect ratio distributions of (a-c) miniemulsion and (d-g) batch samples synthesized at different AHM: HNO<sub>3</sub> molar ratio (1:10, 1:15, 1:20, and 1:25 mol) and constant AHM concentrations (0.20 M) and reaction time (24 h). \*ME sample 1:15 mol not reported because of bad quality of TEM micrographs.

**Table S4.** Average rod length, width and aspect ratio (AR=width/length) and standard deviations of miniemulsion and batch samples synthesized at different AHM: HNO<sub>3</sub> molar ratio (1:10, 1:15, 1:20, and 1:25 mol) and constant AHM concentrations (0.20 M) and reaction time (24 h).

|       | Sample name          | AHM:HNO <sub>3</sub> mol | Length (nm) | Width (nm) | Aspect ratio |
|-------|----------------------|--------------------------|-------------|------------|--------------|
| ME    | MO03-me              | 1:10                     | 656 ± 499   | 176 ± 152  | 0.3 ± 0.1    |
|       | MO05-me <sup>1</sup> | 1:15                     | -           | -          | -            |
|       | MO06-me              | 1:20                     | 358 ± 371   | 94 ± 107   | 0.3 ± 0.1    |
|       | MO07-me              | 1:25                     | 544 ± 327   | 177 ± 134  | 0.3 ± 0.1    |
| batch | MO03-b               | 1:10                     | 1697 ± 445  | 730 ± 345  | 0.4 ± 0.1    |
|       | MO05-b               | 1:15                     | 524 ± 280   | 248 ± 213  | 0.5 ± 0.2    |
|       | MO06-b               | 1:20                     | 466 ± 322   | 143 ± 108  | 0.3 ± 0.1    |
|       | MO07-b               | 1:25                     | 618 ± 365   | 216 ± 128  | 0.4 ± 0.1    |

<sup>1</sup> Insufficient statistics due to bad quality of TEM micrographs

## 5. Effect of ultrasounds and reaction time

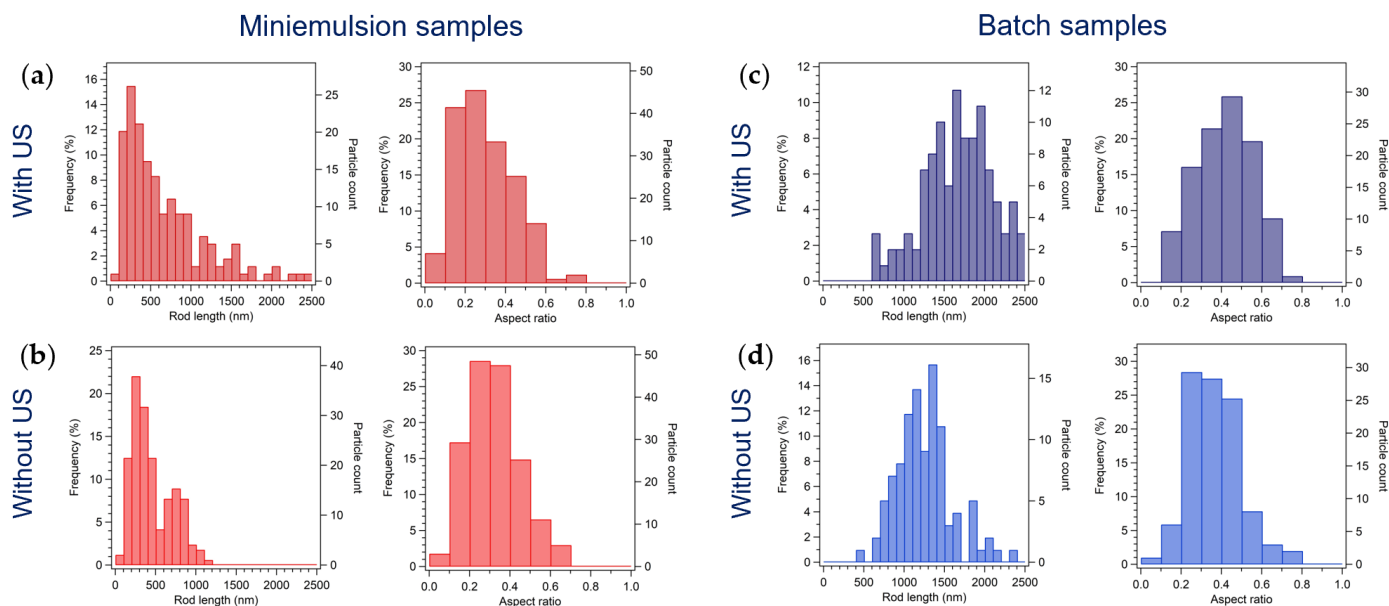

**Figure S5.** Histograms representing rod length and aspect ratio distributions of (a,b) miniemulsion and (c,d) batch samples synthesized by (a,c) applying or (b,d) not applying US after acid addition. [AHM] = 0.20 M; AHM: HNO<sub>3</sub> 1:10 mol, 24 h.

**Table S5.** Average rod length, width and aspect ratio (AR=width/length) and standard deviations of miniemulsion and batch samples synthesized with 18 and 24 h of reaction time, by applying or not US after acid addition and with constant AHM concentrations (0.20 M) and AHM: HNO<sub>3</sub> molar ratio (1:10 mol).

|       | Sample name | Reaction time (h) | US after acid add. | Length (nm) | Width (nm) | Aspect ratio |
|-------|-------------|-------------------|--------------------|-------------|------------|--------------|
| ME    | MO13-me     | 18                | Yes                | 463 ± 265   | 79 ± 56    | 0.2 ± 0.1    |
|       | MO03-me     | 24                | Yes                | 656 ± 499   | 177 ± 152  | 0.3 ± 0.1    |
|       | MO09-me     | 24                | -                  | 450 ± 248   | 140 ± 99   | 0.2 ± 0.1    |
| batch | MO11-b      | 18                | -                  | 1058 ± 308  | 547 ± 294  | 0.5 ± 0.2    |
|       | MO03-b      | 24                | -                  | 1697 ± 445  | 730 ± 345  | 0.4 ± 0.1    |
|       | MO08-b      | 24                | Yes                | 1248 ± 345  | 470 ± 234  | 0.4 ± 0.1    |

<sup>1</sup> Insufficient statistics due to bad quality of TEM micrographs

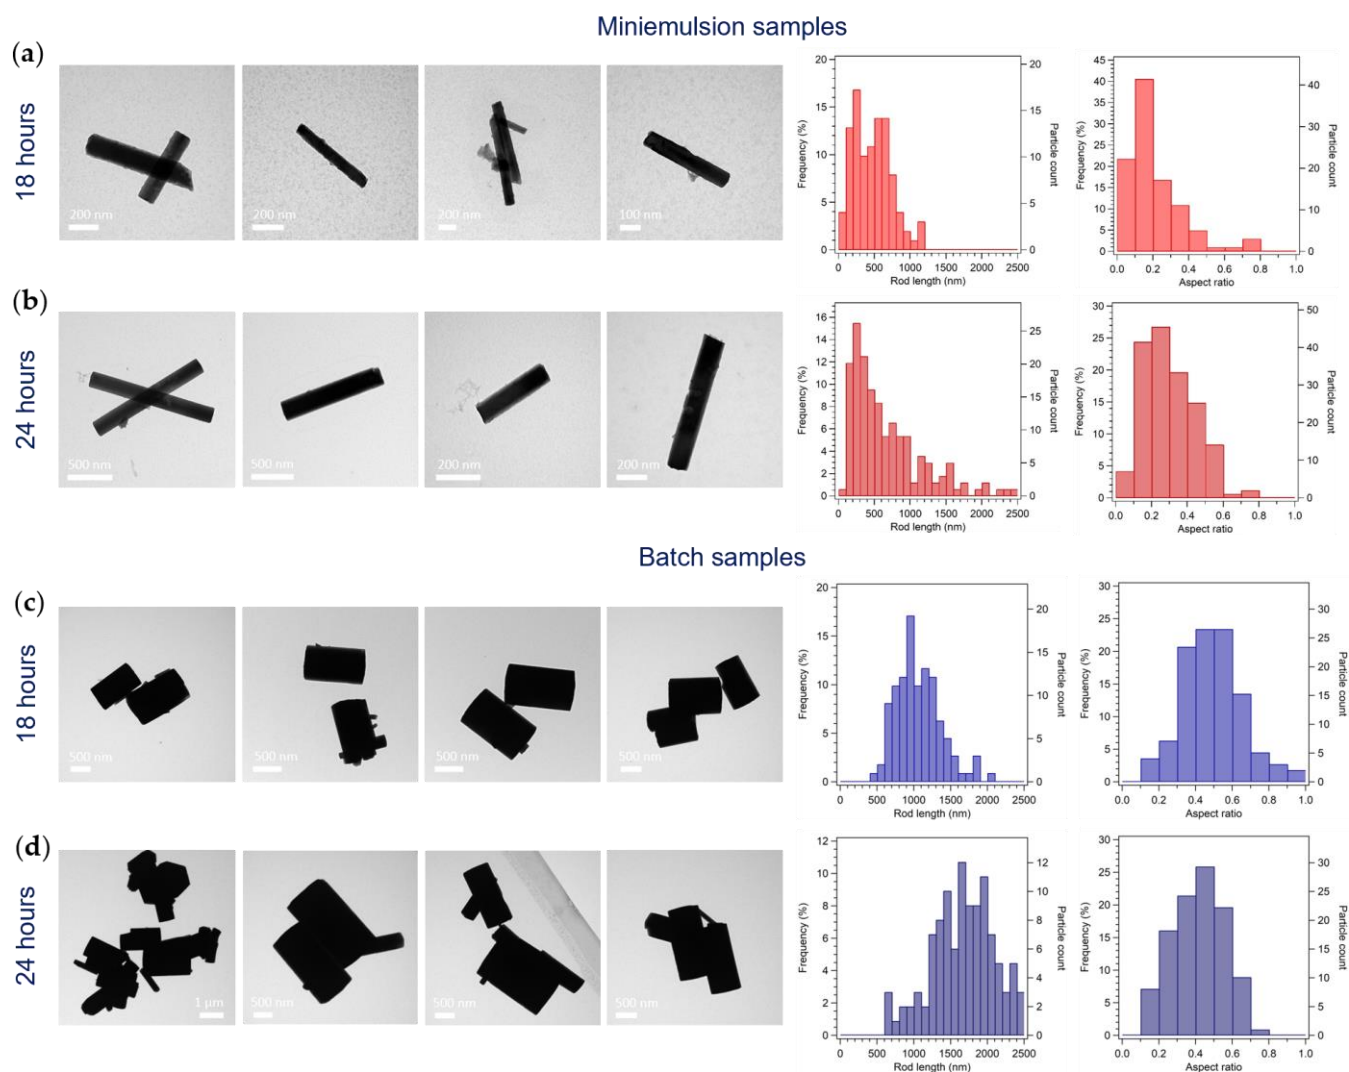

**Figure S6.** TEM micrographs and relative histograms of rod length and aspect ratio distributions of **(a,b)** miniemulsion and **(c,d)** batch samples synthesized with reaction times of 18 hours and 24 hours [AHM] = 0.20 M; AHM:  $\text{HNO}_3$  1:10 mol.

## 6. *In situ* time-resolved SAXS/WAXS study

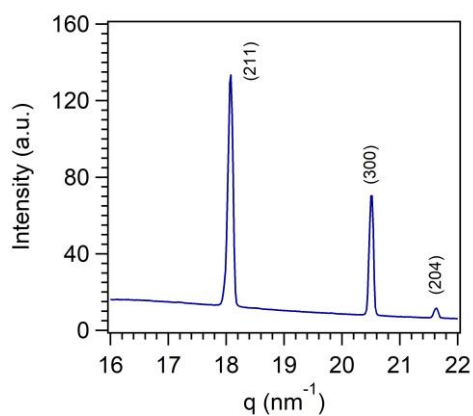

**Figure S7.** WAXS profile of a batch sample synthesized with AHM:  $\text{HNO}_3$  of 1:10 mol at the SAXS beamline at Elettra Sincrotrone Trieste and measured after 24 h.

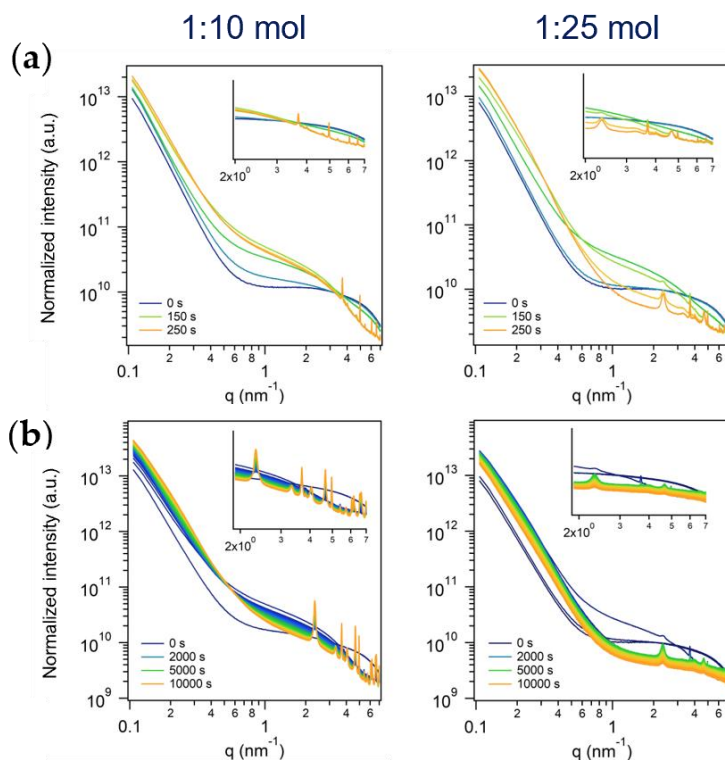

**Figure S8.** *In situ* time-resolved log-log plots of SAXS patterns of the series of experiments performed in ME employing PGPR as surfactant and with different AHM:HNO<sub>3</sub> molar ratios. (a) A SAXS pattern every 50 s from the start of acid addition ( $t = 0$  s) to the end of US (step iii) ( $t = 250$  s) and (b) a SAXS pattern every 100 s from the start of acid addition ( $t = 0$  s) to 10000 s. Insets: zoom on Bragg peaks (1.9-7 nm<sup>-1</sup>).
